# Supplementary material for: Actions Speak Louder Than Words: Health Behaviours and the Literacy of Future Healthcare Professionals
Source: MDPI journal article supplement (doi:10.3390/healthcare10091723), 2022-09-08
Supplement: s1 [file s1]

# Actions speak louder than words: Health behaviours and literacy of future healthcare professionals

## Supplementary Material

**Table S1. Predictors for HL indices – multivariate multinomial logistic regression**

| Outcome category                                                                                                          | Explanatory variable                                              | OR   | 95% CI for OR |             | <i>p value</i> |
|---------------------------------------------------------------------------------------------------------------------------|-------------------------------------------------------------------|------|---------------|-------------|----------------|
|                                                                                                                           |                                                                   |      | Lower limit   | Upper limit |                |
| <b>Model for HL8 statement 1: “I report any unusual signs and symptoms to my doctor or other healthcare professional”</b> |                                                                   |      |               |             |                |
| <i>p for the model=0.010</i>                                                                                              |                                                                   |      |               |             |                |
| <i>Nagelkerke R<sup>2</sup>=0.106, Cox-Snell R<sup>2</sup>=0.097</i>                                                      |                                                                   |      |               |             |                |
| „difficult”                                                                                                               | Sex-male                                                          | 7.91 | 0.98          | 63.9        | 0.052          |
|                                                                                                                           | Sex-female<br><i>Reference category</i>                           | --   | --            | --          | --             |
|                                                                                                                           | Residence – 10.000-100.000 inhabitants                            | 0.34 | 0.09          | 1.25        | 0.104          |
|                                                                                                                           | Residence – above 100.000 inhabitants                             | 1.33 | 0.32          | 5.53        | 0.691          |
|                                                                                                                           | Residence – below 10.000 inhabitants<br><i>Reference category</i> | --   | --            | --          | --             |
| “easy”                                                                                                                    | Sex-male                                                          | 2.65 | 0.31          | 22.20       | 0.370          |
|                                                                                                                           | Sex-female<br><i>Reference category</i>                           | --   | --            | --          | --             |
|                                                                                                                           | Residence – 10.000- 100.000 inhabitants                           | 0.60 | 0.17          | 2.14        | 0.428          |
|                                                                                                                           | Residence – above 100.000 inhabitants                             | 2.05 | 0.49          | 8.52        | 0.324          |
|                                                                                                                           | Residence – below 10.000 inhabitants<br><i>Reference category</i> | --   | --            | --          | --             |
| “very easy”                                                                                                               | Sex-male                                                          | 3.05 | 0.36          | 26.1        | 0.309          |
|                                                                                                                           | Sex-female<br><i>Reference category</i>                           | --   | --            | --          | --             |
|                                                                                                                           | Residence – 10.000- 100.000 inhabitants                           | 0.65 | 0.16          | 2.59        | 0.536          |
|                                                                                                                           | Residence – above 100.000 inhabitants                             | 3.85 | 0.87          | 16.96       | 0.075          |
|                                                                                                                           | Residence – below 10.000 inhabitants<br><i>Reference category</i> | --   | --            | --          | --             |
| <b>Model for HL8 statement 5: “I ask healthcare professionals for information on how to take care of myself properly”</b> |                                                                   |      |               |             |                |
| <i>p for the model=0.0.009</i>                                                                                            |                                                                   |      |               |             |                |

|                                                                                                                                                                                          |                                                                   |          |          |          |         |
|------------------------------------------------------------------------------------------------------------------------------------------------------------------------------------------|-------------------------------------------------------------------|----------|----------|----------|---------|
| <i>Nagelkerke R<sup>2</sup>=0.088, Cox-Snell R<sup>2</sup>=0.0814</i>                                                                                                                    |                                                                   |          |          |          |         |
| “difficult”                                                                                                                                                                              | Residence – 10.000- 100.000 inhabitants                           | 0.78     | 0.33     | 1.87     | 0.579   |
|                                                                                                                                                                                          | Residence – above 100.000 inhabitants                             | 2.78     | 1.31     | 5.89     | 0.008   |
|                                                                                                                                                                                          | Residence – below 10.000 inhabitants<br><i>Reference category</i> | --       | --       | --       | --      |
| “easy”                                                                                                                                                                                   | Residence – 10.000- 100.000 inhabitants                           | 1.33     | 0.53     | 3.34     | 0.534   |
|                                                                                                                                                                                          | Residence – above 100.000 inhabitants                             | 2.46     | 1.05     | 5.74     | 0.037   |
|                                                                                                                                                                                          | Residence – below 10.000 inhabitants<br><i>Reference category</i> | --       | --       | --       | --      |
| “very easy”                                                                                                                                                                              | Residence – 10.000- 100.000 inhabitants                           | 10.0     | 1.15     | 86.77    | 0.036   |
|                                                                                                                                                                                          | Residence – above 100.000 inhabitants                             | 9.5      | 1.10     | 82.45    | 0.041   |
|                                                                                                                                                                                          | Residence – below 10.000 inhabitants<br><i>Reference category</i> | --       | --       | --       | --      |
| <b>Model for HL8 statement 6: “When I buy food, I read nutrition label”</b><br><i>p for the model= 6.683e-06</i><br><i>Nagelkerke R<sup>2</sup>=0.269, Cox-Snell R<sup>2</sup>=0.252</i> |                                                                   |          |          |          |         |
| “difficult”                                                                                                                                                                              | Sex-male                                                          | 0.32     | 0.12     | 0.90     | 0.031   |
|                                                                                                                                                                                          | Sex-female<br><i>Reference category</i>                           | --       | --       | --       | --      |
|                                                                                                                                                                                          | Residence – 10.000- 100.000 inhabitants                           | 2.51     | 0.90     | 6.98     | 0.078   |
|                                                                                                                                                                                          | Residence – above 100.000 inhabitants                             | 2.04     | 0.75     | 5.51     | 0.160   |
|                                                                                                                                                                                          | Residence – below 10.000 inhabitants<br><i>Reference category</i> | --       | --       | --       | --      |
|                                                                                                                                                                                          | Major – Radiography                                               | 2.02e-06 | 5.90e-07 | 6.91e-06 | <0.0001 |
|                                                                                                                                                                                          | Major – Physiotherapy                                             | 1.44e-06 | 3.70e-07 | 5.58e-06 | <0.0001 |
|                                                                                                                                                                                          | Major – Medicine                                                  | 1.56e-06 | 4.51e-07 | 5.37e-06 | <0.0001 |
|                                                                                                                                                                                          | Major – Nursing                                                   | 5.86e-07 | 2.14e-07 | 1.60e-06 | <0.0001 |
|                                                                                                                                                                                          | Major – Public Health                                             | 3.17e-06 | 9.11e-07 | 1.10e-05 | <0.0001 |
|                                                                                                                                                                                          | Major – Dietetics<br><i>Reference category</i>                    | --       | --       | --       | --      |
| “easy”                                                                                                                                                                                   | Sex-male                                                          | 0.28     | 0.11     | 0.76     | 0.012   |
|                                                                                                                                                                                          | Sex-female<br><i>Reference category</i>                           | --       | --       | --       | --      |

|                                                                                                                                                                                                                                 |                                                                   |          |          |          |         |
|---------------------------------------------------------------------------------------------------------------------------------------------------------------------------------------------------------------------------------|-------------------------------------------------------------------|----------|----------|----------|---------|
|                                                                                                                                                                                                                                 | Residence – 10.000- 100.000 inhabitants                           | 0.91     | 0.33     | 2.56     | 0.866   |
|                                                                                                                                                                                                                                 | Residence – above 100.000 inhabitants                             | 1.93     | 0.77     | 4.83     | 0.157   |
|                                                                                                                                                                                                                                 | Residence – below 10.000 inhabitants<br><i>Reference category</i> | --       | --       | --       | --      |
|                                                                                                                                                                                                                                 | Major – Radiography                                               | 1.1e-06  | 3.44e-07 | 3.54e-6  | <0.0001 |
|                                                                                                                                                                                                                                 | Major – Physiotherapy                                             | 1.62e-06 | 4.97e-07 | 5.26e-06 | <0.0001 |
|                                                                                                                                                                                                                                 | Major – Medicine                                                  | 6.89e-07 | 2.05e-07 | 2.3e-06  | <0.0001 |
|                                                                                                                                                                                                                                 | Major – Nursing                                                   | 4.84e-07 | 1.98e-07 | 1.18e-06 | <0.0001 |
|                                                                                                                                                                                                                                 | Major – Public Health                                             | 1.99e-06 | 6.12e-07 | 6.47e-06 | <0.0001 |
|                                                                                                                                                                                                                                 | Major – Dietetics<br><i>Reference category</i>                    | --       | --       | --       | --      |
| “very easy”                                                                                                                                                                                                                     | Sex-male                                                          | 0.44     | 1.46e-01 | 1.33e+00 | 0.145   |
|                                                                                                                                                                                                                                 | Sex-female<br><i>Reference category</i>                           | --       | --       | --       | --      |
|                                                                                                                                                                                                                                 | Residence – 10.000- 100.000 inhabitants                           | 3.65     | 1.01     | 13.18    | 0.048   |
|                                                                                                                                                                                                                                 | Residence – above 100.000 inhabitants                             | 4.21     | 1.27     | 14.01    | 0.019   |
|                                                                                                                                                                                                                                 | Residence – below 10.000 inhabitants<br><i>Reference category</i> | --       | --       | --       | --      |
|                                                                                                                                                                                                                                 | Major – Radiography                                               | 1.12e-07 | 2.18e-08 | 5.76e-07 | <0.0001 |
|                                                                                                                                                                                                                                 | Major – Physiotherapy                                             | 3.67e-07 | 1.01e-07 | 1.33e-06 | <0.0001 |
|                                                                                                                                                                                                                                 | Major – Medicine                                                  | 4.87e-07 | 1.56e-07 | 1.52e-06 | <0.0001 |
|                                                                                                                                                                                                                                 | Major – Nursing                                                   | 1.12e-07 | 4.26e-08 | 2.93e-07 | <0.0001 |
|                                                                                                                                                                                                                                 | Major – Public Health                                             | 1.63e-07 | 3.65e-08 | 7.33e-07 | <0.0001 |
|                                                                                                                                                                                                                                 | Major – Dietetics<br><i>Reference category</i>                    | --       | --       | --       | --      |
| <b>Model for HL8 statement 7: “I participate in educational programmes on how to take care of my health”</b><br><i>p for the model</i> = 0.107<br><i>Nagelkerke R<sup>2</sup></i> =0.138, <i>Cox-Snell R<sup>2</sup></i> =0.124 |                                                                   |          |          |          |         |
| “difficult”                                                                                                                                                                                                                     | Major – Radiography                                               | 0.16     | 0.03     | 0.73     | 0.018   |
|                                                                                                                                                                                                                                 | Major – Physiotherapy                                             | 0.31     | 0.07     | 1.33     | 0.114   |
|                                                                                                                                                                                                                                 | Major – Medicine                                                  | 0.38     | 0.09     | 1.69     | 0.206   |
|                                                                                                                                                                                                                                 | Major – Nursing                                                   | 0.23     | 0.06     | 0.91     | 0.036   |
|                                                                                                                                                                                                                                 | Major – Public Health                                             | 0.23     | 0.05     | 1.00     | 0.049   |
|                                                                                                                                                                                                                                 | Major – Dietetics<br><i>Reference category</i>                    | --       | --       | --       | --      |

|                                                                                                                                                                                                 |                                                |          |          |          |         |
|-------------------------------------------------------------------------------------------------------------------------------------------------------------------------------------------------|------------------------------------------------|----------|----------|----------|---------|
| “easy”                                                                                                                                                                                          | Major – Radiography                            | 0.14     | 0.03     | 0.72     | 0.018   |
|                                                                                                                                                                                                 | Major – Physiotherapy                          | 0.03     | 0.002    | 0.29     | 0.003   |
|                                                                                                                                                                                                 | Major – Medicine                               | 0.15     | 0.03     | 0.81     | 0.028   |
|                                                                                                                                                                                                 | Major – Nursing                                | 0.12     | 0.02     | 0.43     | 0.002   |
|                                                                                                                                                                                                 | Major – Public Health                          | 1.44e-07 | 0.04     | 0.87     | 0.033   |
|                                                                                                                                                                                                 | Major – Dietetics<br><i>Reference category</i> | --       | --       | --       | --      |
| “very easy”                                                                                                                                                                                     | Major – Radiography                            | 9.82e-09 | 9.82e-09 | 9.83e-09 | <0.0001 |
|                                                                                                                                                                                                 | Major – Physiotherapy                          | 1.92e-08 | 1.92e-08 | 1.92e-08 | <0.0001 |
|                                                                                                                                                                                                 | Major – Medicine                               | 0.09     | 6.75e-03 | 1.22     | 0.070   |
|                                                                                                                                                                                                 | Major – Nursing                                | 0.12     | 0.017    | 0.79     | 0.028   |
|                                                                                                                                                                                                 | Major – Public Health                          | 1.45e-07 | *        | *        | 0.981   |
|                                                                                                                                                                                                 | Major – Dietetics<br><i>Reference category</i> | --       | --       | --       | --      |
| <b>Model for HL8 statement 8: “When needed, I use counselling or therapy services”</b><br><i>p for the model= 0.035</i><br><i>Nagelkerke R<sup>2</sup>=0.130, Cox-Snell R<sup>2</sup>=0.120</i> |                                                |          |          |          |         |
| “difficult”                                                                                                                                                                                     | Major – Radiography                            | 0.44     | 0.11     | 1.8      | 0.252   |
|                                                                                                                                                                                                 | Major – Physiotherapy                          | 0.54     | 0.13     | 2.2      | 0.394   |
|                                                                                                                                                                                                 | Major – Medicine                               | 0.70     | 0.16     | 2.98     | 0.639   |
|                                                                                                                                                                                                 | Major – Nursing                                | 0.34     | 0.09     | 1.23     | 0.100   |
|                                                                                                                                                                                                 | Major – Public Health                          | 0.76     | 0.18     | 3.11     |         |
|                                                                                                                                                                                                 | Major – Dietetics<br><i>Reference category</i> | --       | --       | --       | --      |
| “easy”                                                                                                                                                                                          | Major – Radiography                            | 0.24     | 0.05     | 1.13     | 0.07    |
|                                                                                                                                                                                                 | Major – Physiotherapy                          | 0.04     | 0.003    | 0.43     | 0.008   |
|                                                                                                                                                                                                 | Major – Medicine                               | 0.56     | 0.12     | 2.49     | 0.442   |
|                                                                                                                                                                                                 | Major – Nursing                                | 0.23     | 0.06     | 0.88     | 0.032   |
|                                                                                                                                                                                                 | Major – Public Health                          | 0.39     | 0.09     | 1.80     | 0.229   |
|                                                                                                                                                                                                 | Major – Dietetics<br><i>Reference category</i> | --       | --       | --       | --      |
| “very easy”                                                                                                                                                                                     | Major – Radiography                            | 1.97e-07 | *        | *        | 0.981   |
|                                                                                                                                                                                                 | Major – Physiotherapy                          | 0.27     | 0.04     | 1.79     | 0.176   |
|                                                                                                                                                                                                 | Major – Medicine                               | 0.25     | 0.03     | 2.00     | 0.191   |
|                                                                                                                                                                                                 | Major – Nursing                                | 0.59     | 0.13     | 2.7      | 0.499   |
|                                                                                                                                                                                                 | Major – Public Health                          | 0.67     | 0.12     | 3.75     | 0.646   |
|                                                                                                                                                                                                 | Major – Dietetics                              | --       | --       | --       | --      |

|  |                           |  |  |  |  |
|--|---------------------------|--|--|--|--|
|  | <i>Reference category</i> |  |  |  |  |
|--|---------------------------|--|--|--|--|

\* 95% CI estimated as (0.00; Inf) due to a very small number of cases

**Table S2. Predictors for BMI in the cohort – multivariate linear regression**

| Independent variable                           | B     | S.E. for B | 95% CI for B |             | <i>p value</i>  |
|------------------------------------------------|-------|------------|--------------|-------------|-----------------|
|                                                |       |            | Lower limit  | Upper limit |                 |
| Sex-male                                       | 2.52  | 0.49       | 1.55         | 3.5         | <i>7.24e-07</i> |
| Sex-female<br><i>Reference category</i>        | --    | --         | --           | --          | --              |
| Major – Radiography                            | 1.77  | 0.78       | 0.21         | 3.3         | <i>0.026</i>    |
| Major – Physiotherapy                          | -0.41 | 0.8        | -1.98        | 1.16        | <i>0.606</i>    |
| Major – Medicine                               | 0.136 | 0.78       | -1.41        | 1.68        | <i>0.862</i>    |
| Major – Nursing                                | 1.70  | 0.65       | 0.42         | 2.99        | <i>0.009</i>    |
| Major – Public Health                          | 1.76  | 0.73       | 0.32         | 3.20        | <i>0.017</i>    |
| Major – Dietetics<br><i>Reference category</i> | --    | --         | --           | --          | --              |

*p for the model=1.99e-06, R<sup>2</sup>=0.123*

**Table S3. Predictors for HBI subscales – multivariate linear regression**

| Independent variable                                         | B     | S.E. for B | 95% CI for B |             | <i>p value</i> |
|--------------------------------------------------------------|-------|------------|--------------|-------------|----------------|
|                                                              |       |            | Lower limit  | Upper limit |                |
| <b><i>Model for HBI Total</i></b>                            |       |            |              |             |                |
| <i>p for the model=0.029, R<sup>2</sup>=0.03</i>             |       |            |              |             |                |
| Sex-male                                                     | -3.85 | 1.78       | -7.35        | -0.35       | <i>0.031</i>   |
| Sex-female<br><i>Reference category</i>                      | --    | --         | --           | --          | --             |
| Monthly income – 1000-2000 PLN                               | -4.55 | 2.15       | -8.79        | -0.31       | <i>0.035</i>   |
| Monthly income – above 2000 PLN                              | -2.65 | 2.19       | -6.95        | 1.65        | 0.226          |
| Monthly income – below 1000 PLN<br><i>Reference category</i> | --    | --         | --           | --          | --             |
| <b><i>Model for HBI Proper Eating Habits</i></b>             |       |            |              |             |                |
| <i>p for the model= 5.22e-08, R<sup>2</sup>=0.162</i>        |       |            |              |             |                |
| Sex-male                                                     | -0.43 | 0.11       | -0.66        | -0.21       | <i>0.0002</i>  |
| Sex-female<br><i>Reference category</i>                      | --    | --         | --           | --          | --             |

|                                                                                              |       |      |       |       |          |
|----------------------------------------------------------------------------------------------|-------|------|-------|-------|----------|
| Residence – 10.000- 100.000 inhabitants                                                      | 0.21  | 0.12 | -0.03 | 0.45  | 0.088    |
| Residence – above 100.000 inhabitants                                                        | 0.25  | 0.11 | 0.03  | 0.46  | 0.023    |
| Residence – below 10.000 inhabitants<br><i>Reference category</i>                            | --    | --   | --    | --    | --       |
| Major – Radiography                                                                          | -0.76 | 0.18 | -1.11 | -0.38 | 6.29e-05 |
| Major – Physiotherapy                                                                        | -0.61 | 0.18 | -0.97 | -0.25 | 0.001    |
| Major – Medicine                                                                             | -0.5  | 0.18 | -0.86 | -0.15 | 0.006    |
| Major – Nursing                                                                              | -0.71 | 0.16 | -1.02 | -0.41 | 7.83e-06 |
| Major – Public Health                                                                        | -0.81 | 0.17 | -1.15 | -0.48 | 2.44e-06 |
| Major – Dietetics<br><i>Reference category</i>                                               | --    | --   | --    | --    | --       |
| <b>Model for HBI Healthy Practices</b><br><i>p for the model= 0.018, R<sup>2</sup>=0.019</i> |       |      |       |       |          |
| Sex-male                                                                                     | -0.23 | 0.04 | -0.42 | -0.04 | 0.018    |
| Sex-female<br><i>Reference category</i>                                                      | --    | --   | --    | --    | --       |
